# Supplementary material for: A physical approach for the estimation of the SERS enhancement factor through the enrichment and separation of target molecules using magnetic adsorbents
Source: Royal Society of Chemistry journal article supplement (doi:10.1039/d0ra03019h), 2020-01-01
Supplement: d0ra03019h1.pdf [file d0ra03019h1.pdf]

Electronic supplementary information:

## **A Physical Approach for the Estimation of SERS Enhancement Factor through Enrichment, Separation of Target Molecules using Magnetic Absorbents**

Danhui Zhao,<sup>†a</sup> Kui Lin,<sup>†b</sup> Lanhui Wang,<sup>a</sup> Zhigang Qiu,<sup>c</sup> Xin Zhao,<sup>d</sup> Kunze Du,<sup>a</sup> Lifeng Han,<sup>a</sup> Fei Tian,<sup>\*a</sup> and Yanxu Chang,<sup>\*\*a</sup>

<sup>a</sup> Tianjin Key Laboratory of TCM Chemistry and Analysis, Tianjin University of Traditional Chinese Medicine, Tianjin, 301617, P.R. China. E-mail: [tianfei.louise@163.com](mailto:tianfei.louise@163.com) (F. Tian), Tel: +86 22-5959-6163; Email: [tcmcyx@126.com](mailto:tcmcyx@126.com) (Y. Chang), Tel: (+86) 22 59596162.

<sup>b</sup> Analytical Instrumentation Centre, Tianjin University, Tianjin 300072, P.R. China.

<sup>c</sup> Department of Environment and Health, Tianjin Institute of Environmental and Operational Medicine, Tianjin 300050, P.R. China

<sup>d</sup> Key Laboratory of Pharmacology of Traditional Chinese Medical Formulae, Tianjin University of Traditional Chinese Medicine, Tianjin, P.R. China

<sup>†</sup> Danhui Zhao and Kui Lin contributed equally to this work.

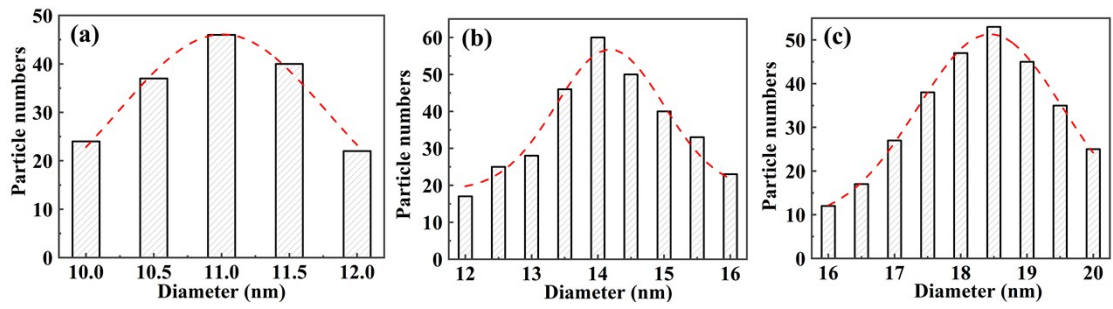

Figure S1: The size distribution of the (a) Fe<sub>3</sub>O<sub>4</sub>@1G NPs; (b) Fe<sub>3</sub>O<sub>4</sub>@3G NPs; and (c) Fe<sub>3</sub>O<sub>4</sub>@5G NPs.

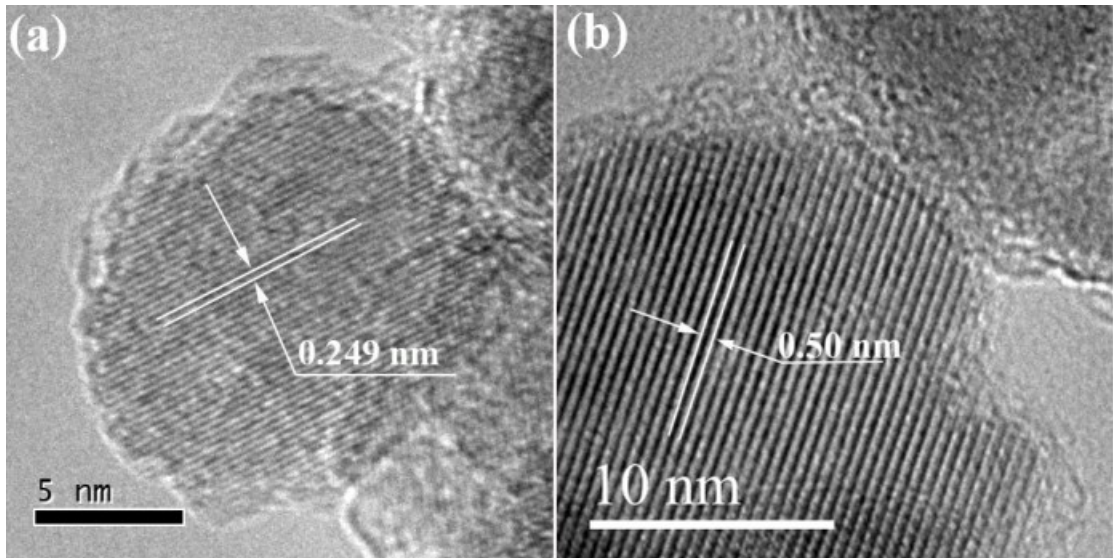

Figure S2: High-magnification TEM images.

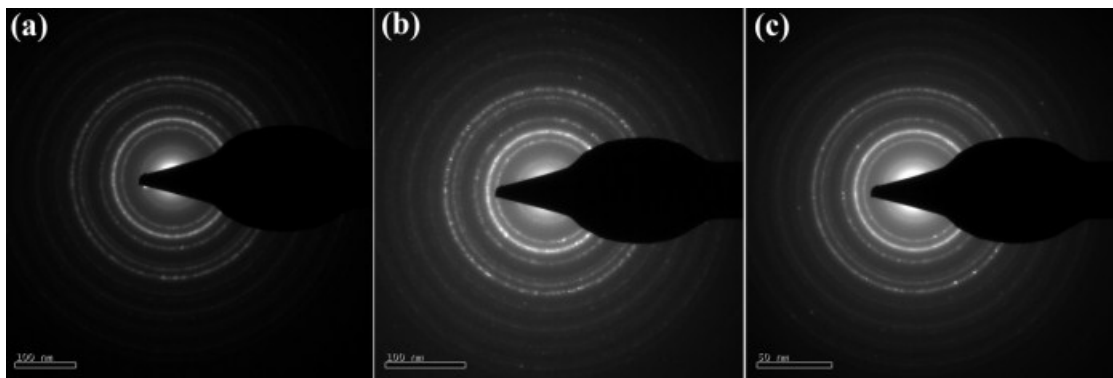

Figure S3: SAED patterns of the (a) Fe<sub>3</sub>O<sub>4</sub>@1G NPs; (b) Fe<sub>3</sub>O<sub>4</sub>@3G NPs; and (c) Fe<sub>3</sub>O<sub>4</sub>@5G NPs.

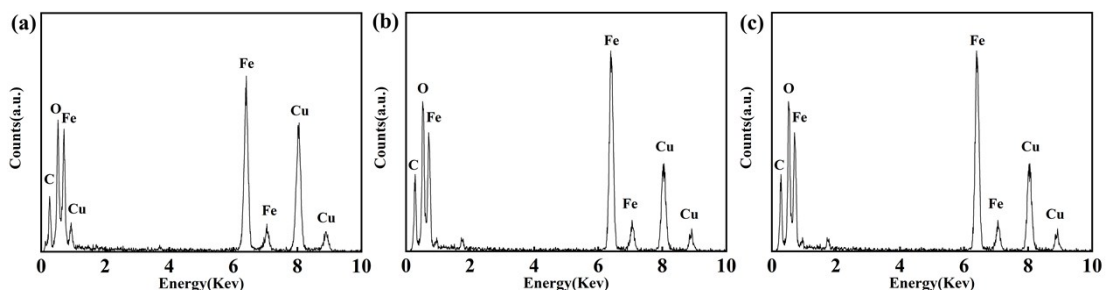

Figure S4: EDS spectra of (a)  $\text{Fe}_3\text{O}_4@1\text{G}$  NPs; (b)  $\text{Fe}_3\text{O}_4@3\text{G}$  NPs; and (c)  $\text{Fe}_3\text{O}_4@5\text{G}$  NPs.

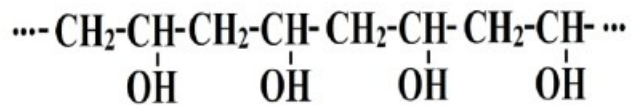

### Molecular Structure of PVA

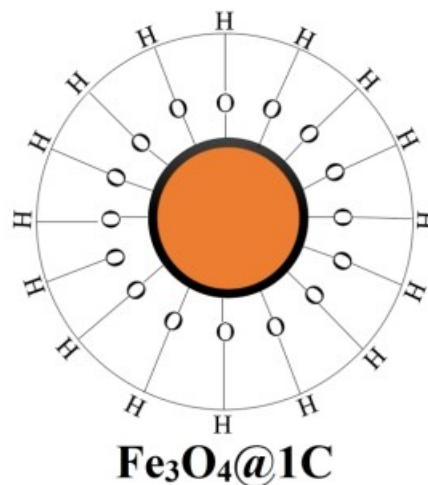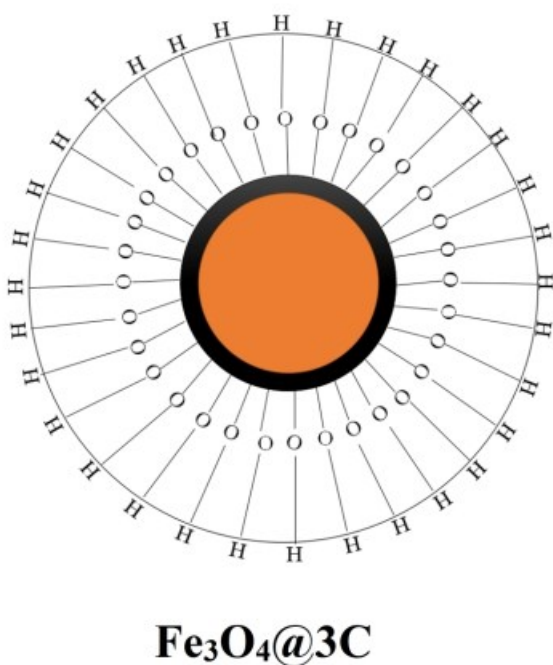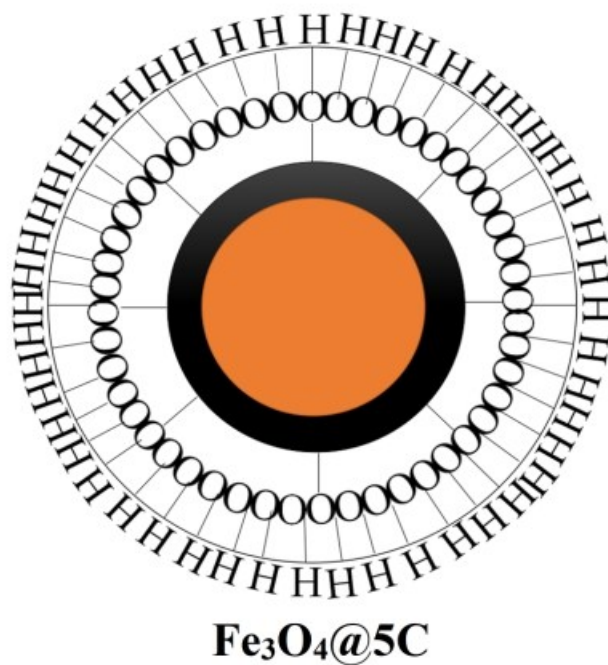

Fig. S5 Schematic diagram of the formation of core-shell  $\text{Fe}_3\text{O}_4@$ DGL NPs with different core sizes and graphene layers.

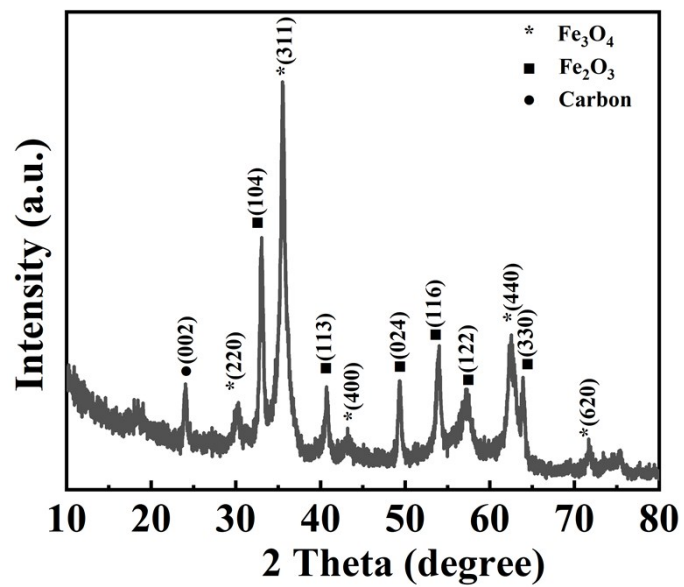

Figure S6: XRD pattern of the product prepared using H<sub>2</sub>O/ EG ratio of 60 mL:20 mL.

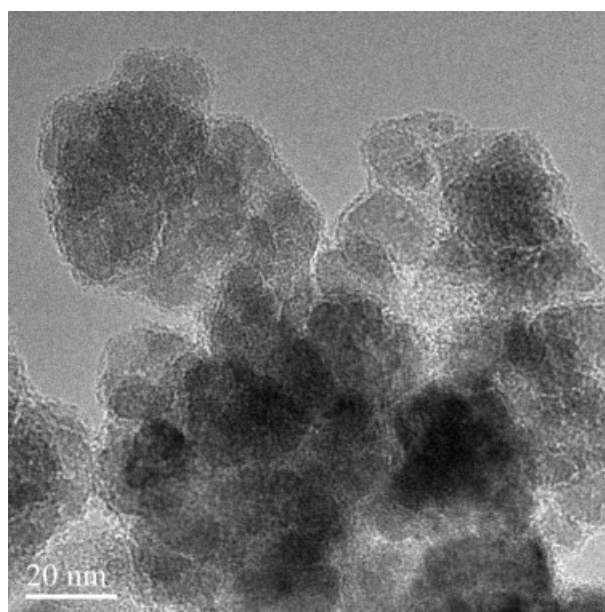

Figure S7: High-resolution TEM image of the product prepared using H<sub>2</sub>O/ EG ratio of 60 mL:20 mL.

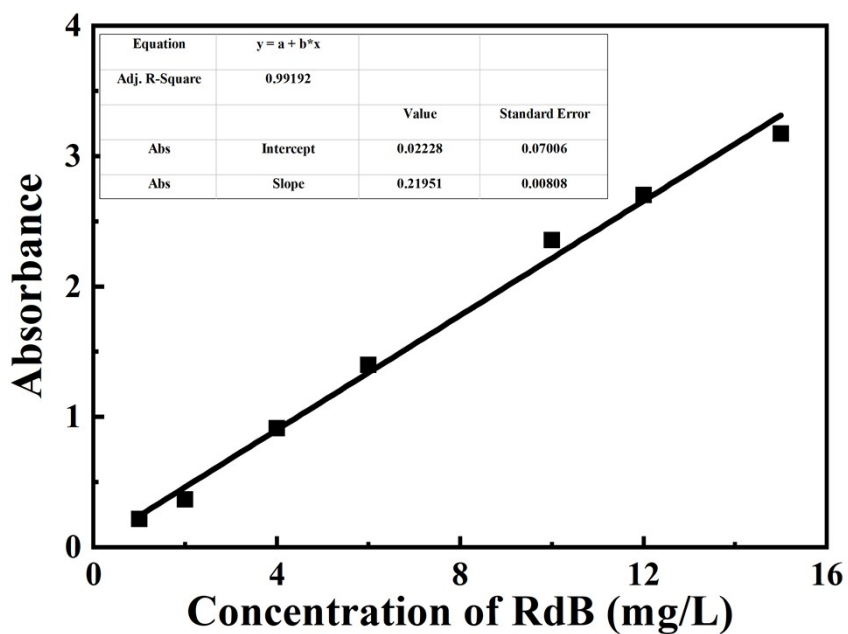

Figure S8: The calibration curve of RhB working solution.

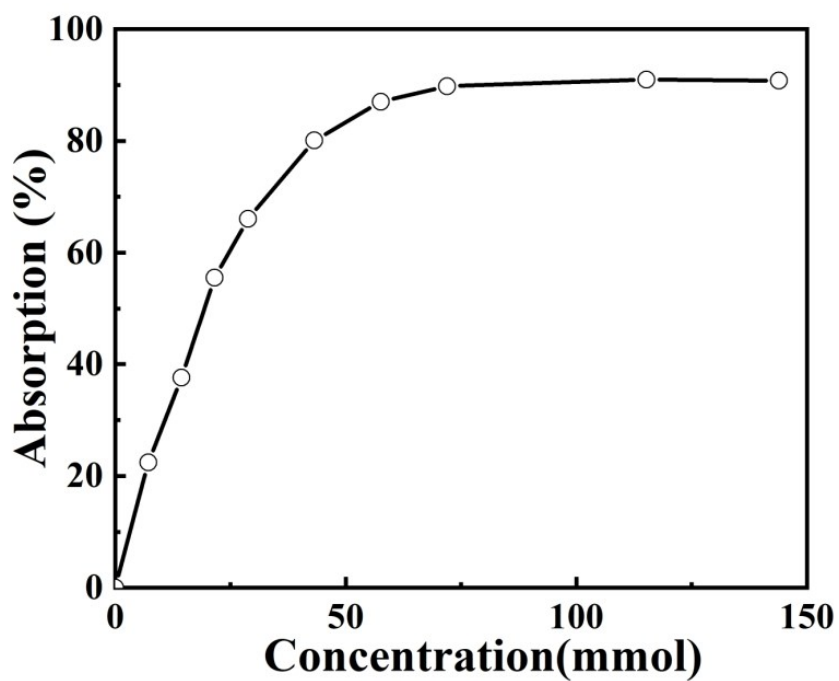

Fig. S9 The absorption efficiency of RhB using Fe<sub>3</sub>O<sub>4</sub>@1G NPs as nano-absorbent

**Table S1. The intensities and band assignments in SERS spectra of RdB with concentration of  $10^{-5}$  m/L from the  $\text{Fe}_3\text{O}_4@1\text{G}$  NPs**

| Characteristic bands of RdB | Assignment           | $\text{Fe}_3\text{O}_4@1\text{G}$ EF |
|-----------------------------|----------------------|--------------------------------------|
| 1645 $\text{cm}^{-1}$       | arom C-C stretching  | $1.64 \times 10^5$                   |
| 1507 $\text{cm}^{-1}$       | arom C-C stretching  | $2.2 \times 10^5$                    |
| 1355 $\text{cm}^{-1}$       | arom C-C stretching  | $1.75 \times 10^5$                   |
| 1280 $\text{cm}^{-1}$       | C-H in plane bending | $1.31 \times 10^5$                   |
| 1192 $\text{cm}^{-1}$       | C-H in plane bending | $1.26 \times 10^5$                   |

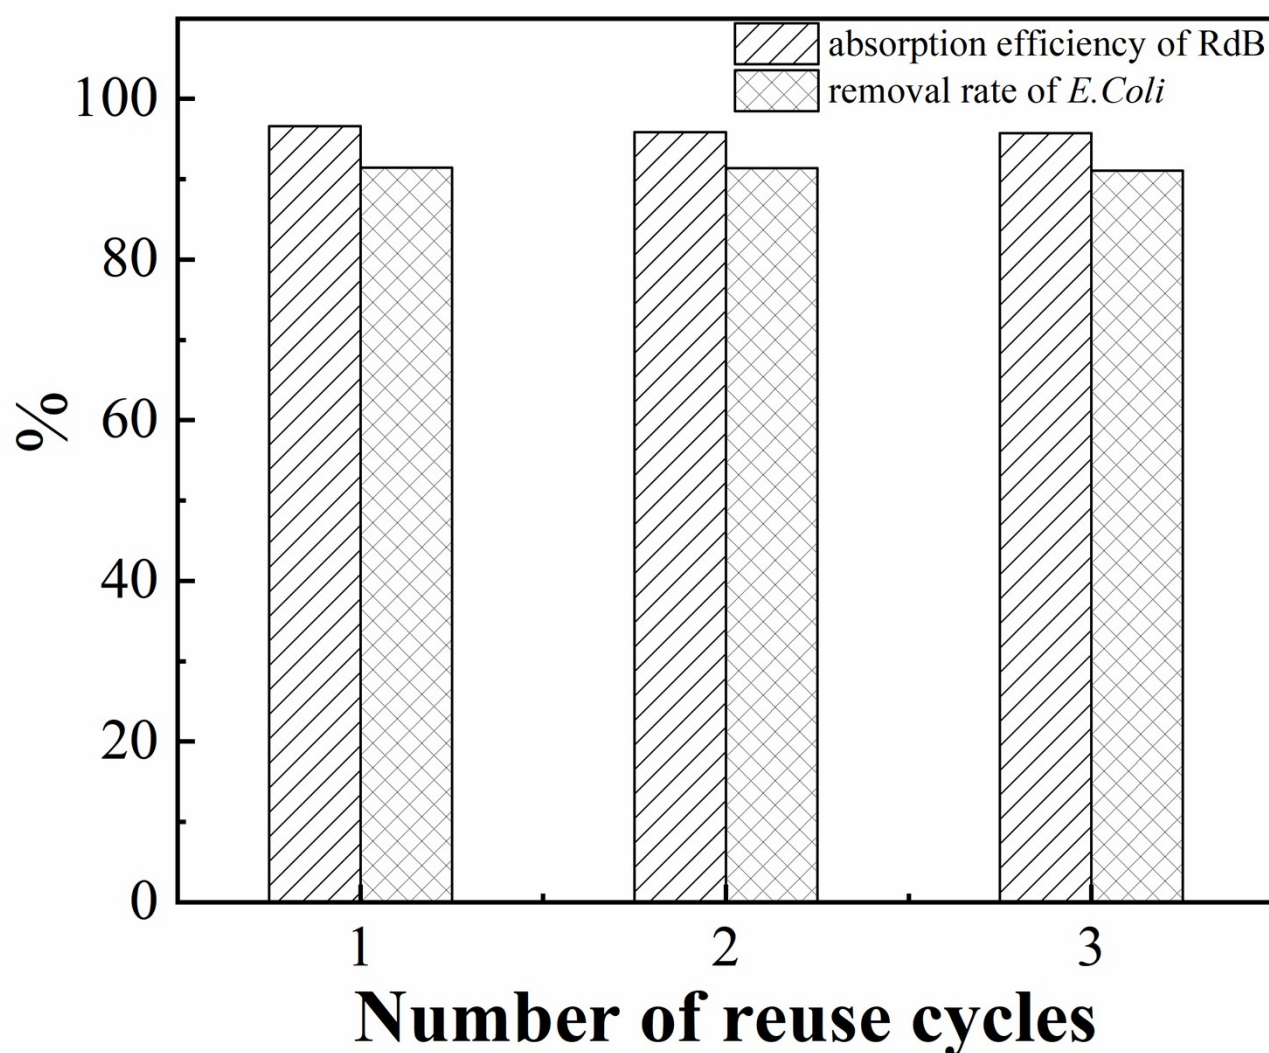

**Fig. S10 The recyclability of 200 mg  $\text{Fe}_3\text{O}_4@1\text{G}$  NPs for the adsorption of RdB and removal of *E. Coli* from water (conditions: Room temperature =  $25 \pm 1^\circ\text{C}$ ; contact time = 4 hr).**
